# Supplementary material for: Construction and Performance Evaluation of Nicandra physalodes (Linn.) Gaertn. Polysaccharide-Based Nanogel
Source: MDPI journal article supplement (doi:10.3390/polym15081933), 2023-04-19
Supplement: s1 [file s1]

# Construction and Performance Evaluation of *Nicandra physalodes* (Linn.) Gaertn. Polysaccharide-Based Nanogel

Fangyan Liu <sup>†</sup>, Chen Shen <sup>†</sup>, Xuelian Chen, Fei Gao and Yin Chen <sup>\*</sup>

College of Food and Pharmacy, Zhejiang Ocean University, Zhoushan 316000, China;  
fangyanliuliu@outlook.com (F.L.); fei18957239291@outlook.com (C.S.);  
zhang17364621814@outlook.com (X.C.); gaofei565513128@outlook.com (F.G.)

<sup>\*</sup> Correspondence: chenying@zjou.edu.cn

<sup>†</sup> These authors contributed equally to this work.

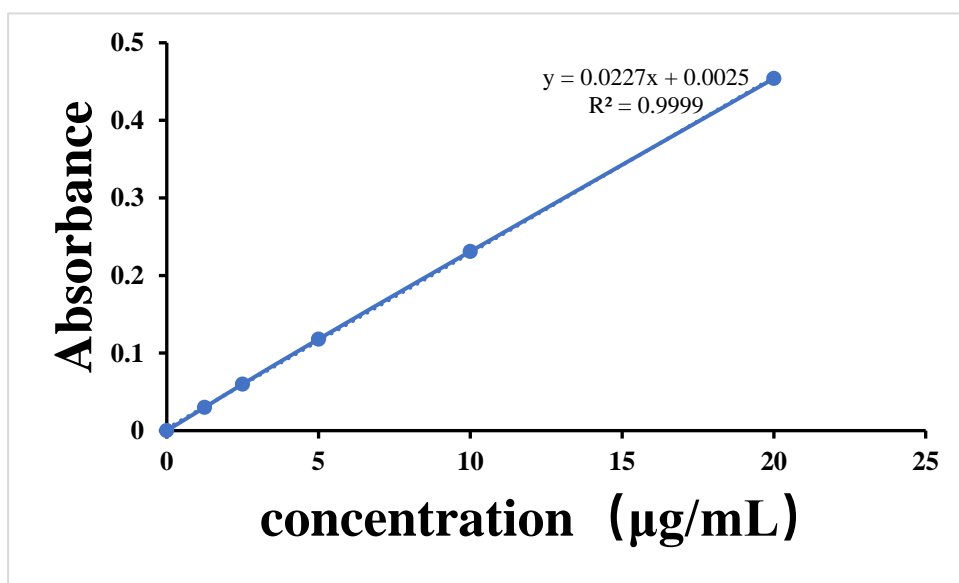

Figure S1. The standard curve of DOX.
